# Supplementary material
Source: MDPI journal article supplement (https://www.mdpi.com/2673-4931/3/1/83)
Supplement: s1 [file s1]

# A decision support system for sustainable forest management and ecosystem service provisioning at the enterprise scale

T. Thrippleton<sup>1\*</sup>, C. Blattert<sup>2</sup>, R. Mey<sup>1</sup>, J. Zell<sup>1</sup>, E. Thürig<sup>1</sup>, J. Schweier<sup>1</sup>

<sup>1</sup> Swiss Federal Institute for Forest, Snow and Landscape Research

<sup>2</sup> University of Jyväskylä, Finland

Contact: [timothy.thrippleton@wsl.ch](mailto:timothy.thrippleton@wsl.ch)

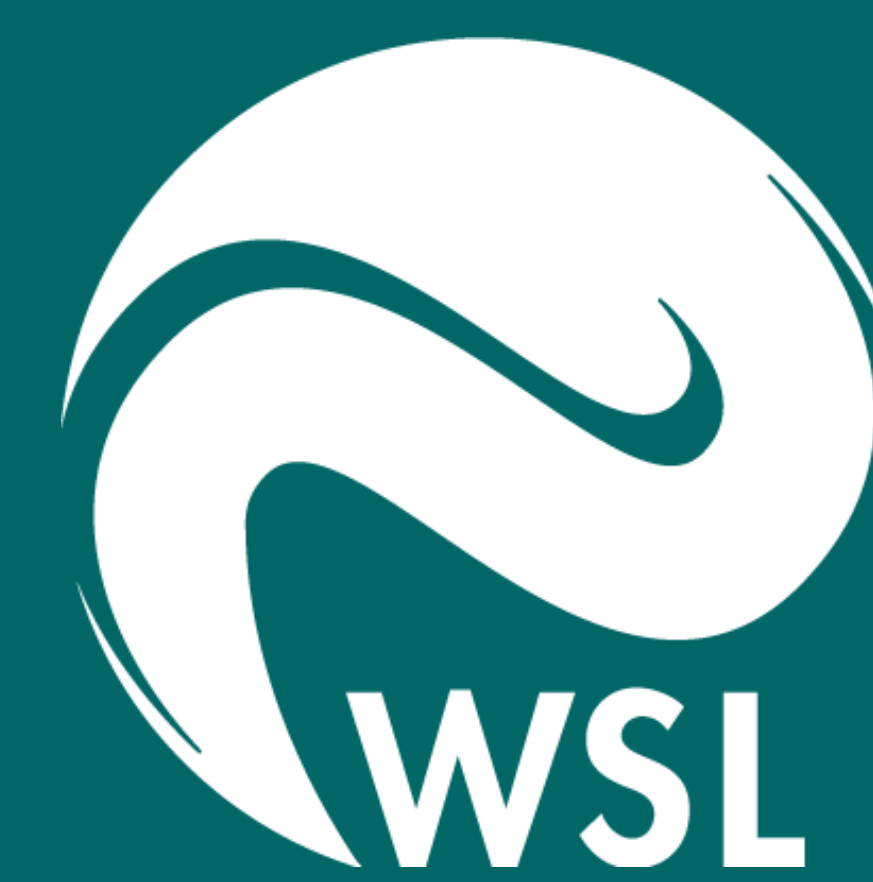

1<sup>st</sup> International Electronic Conference on Forests, 15–30 November 2020

Schweizerische Eidgenossenschaft  
Confédération suisse  
Confederazione Svizzera  
Confederaziun svizra

**73 NRP** Sustainable Economy  
National Research Programme

## Background and aim of the project:

- Changes in climatic conditions and societal demands for ecosystem services (ES) make the **planning of sustainable forest management highly challenging**
- Within the research project SessFor, a decision support system (DSS) for strategic planning at the forest enterprise level is developed

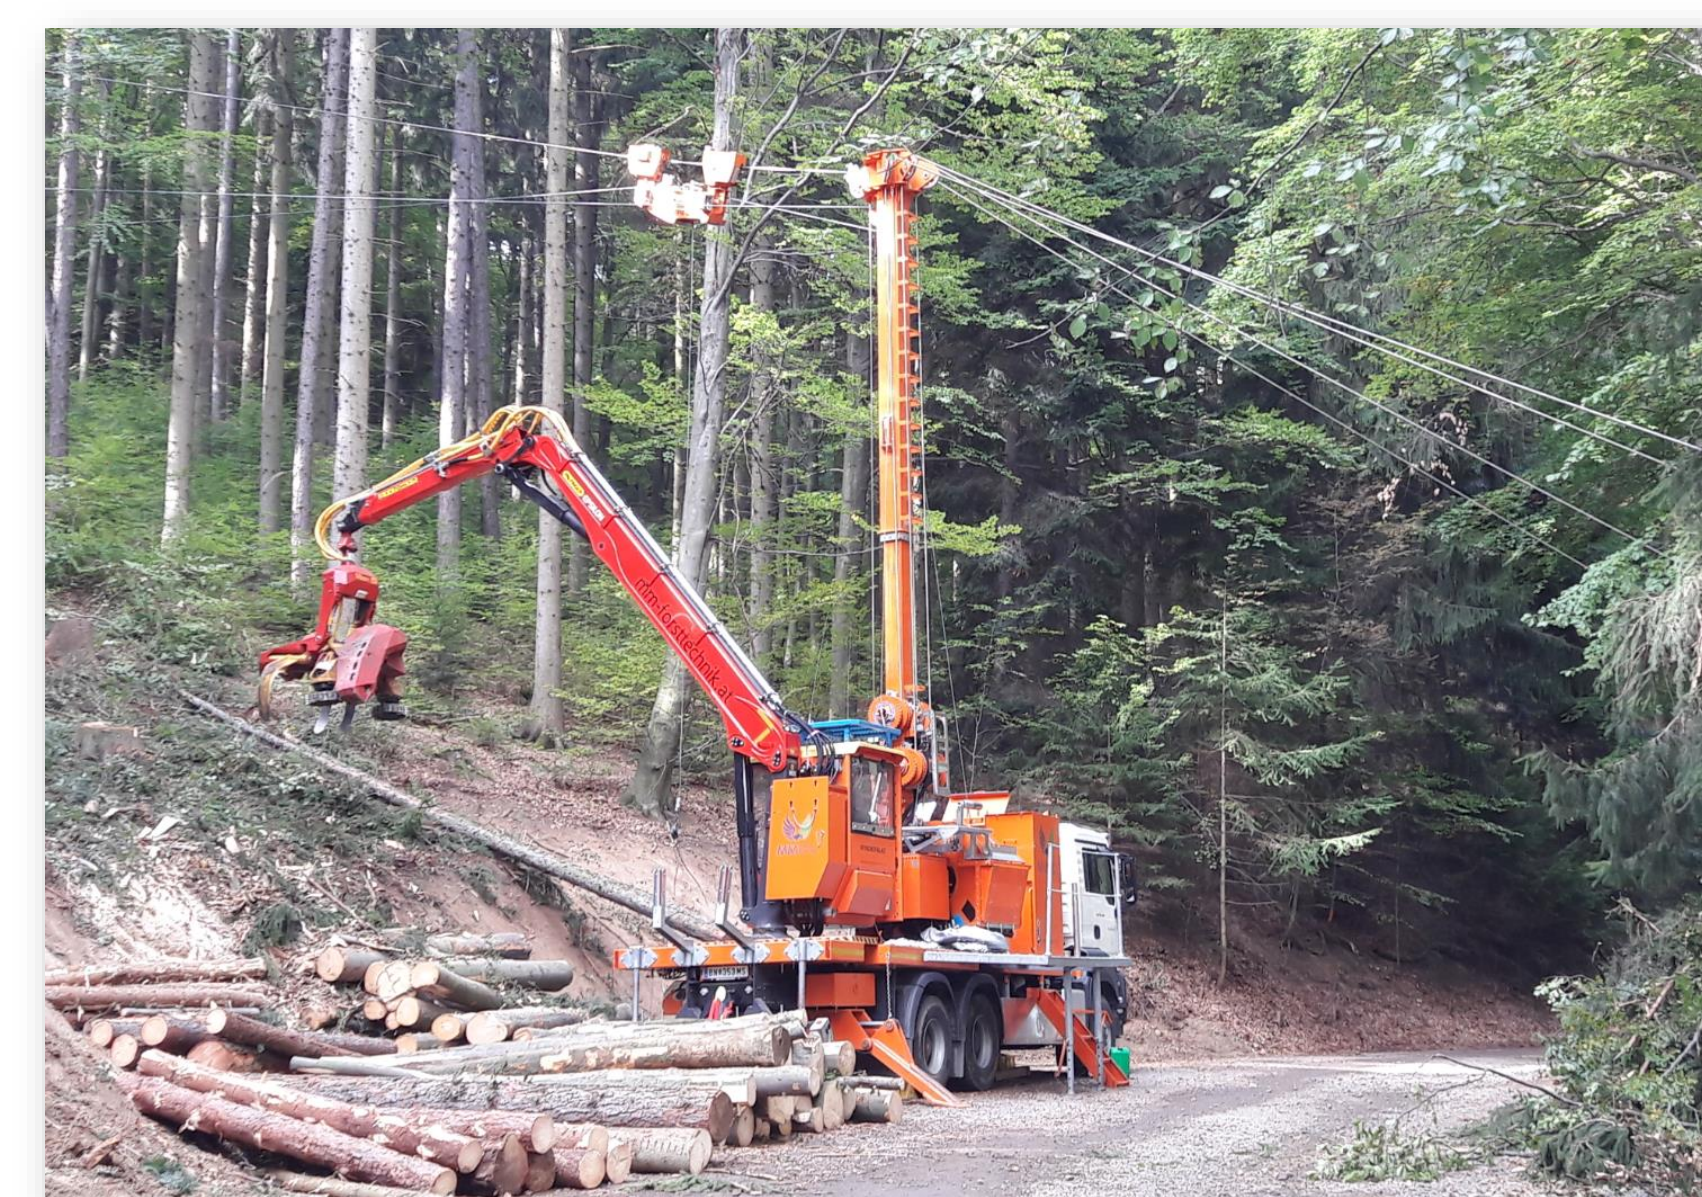

Fig. 1: Timber harvest in steep terrain. © J. Schweier, WSL

## Material and methods:

- DSS based on **climate sensitive** forest model (Zell et al., 2020)
- Various indicators for **biodiversity** and **ES** considered (Fig. 2)
- First DSS application at case study ‘Wagenrain’ in plateau region of Switzerland
- Further case studies in other regions ongoing

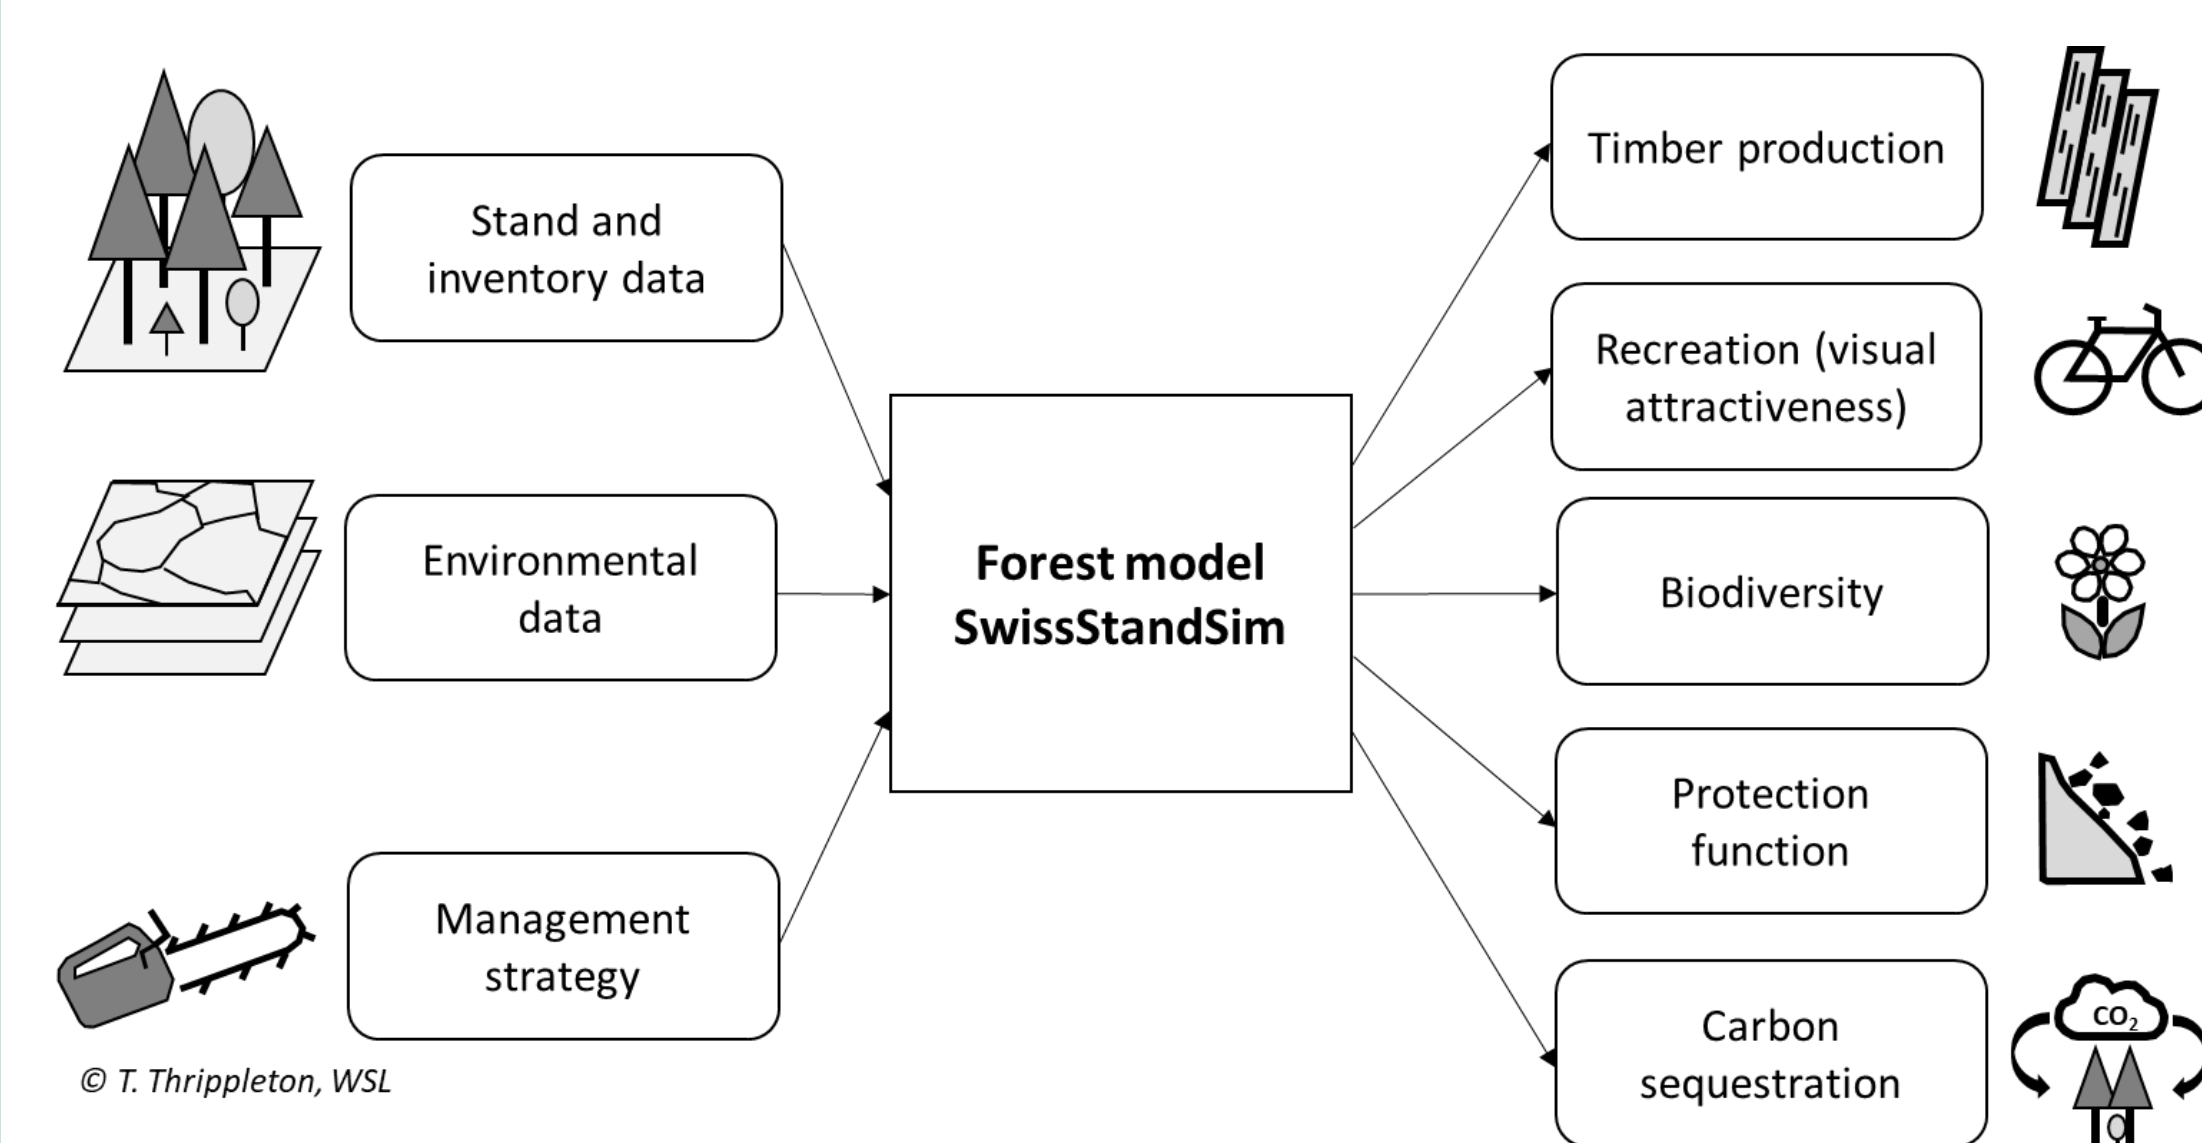

Fig. 2: Structure of decision support system, based on Blattert et al. (2018)

## Preliminary results:

- Evaluation of 4 management strategies under present climate investigated for years 2010 to 2060
- **Trade-offs** between carbon sequestration, timber production and biodiversity (Fig. 3)
- Decrease of recreation value over time under ‘less intensive management’ strategy (Fig. 4)

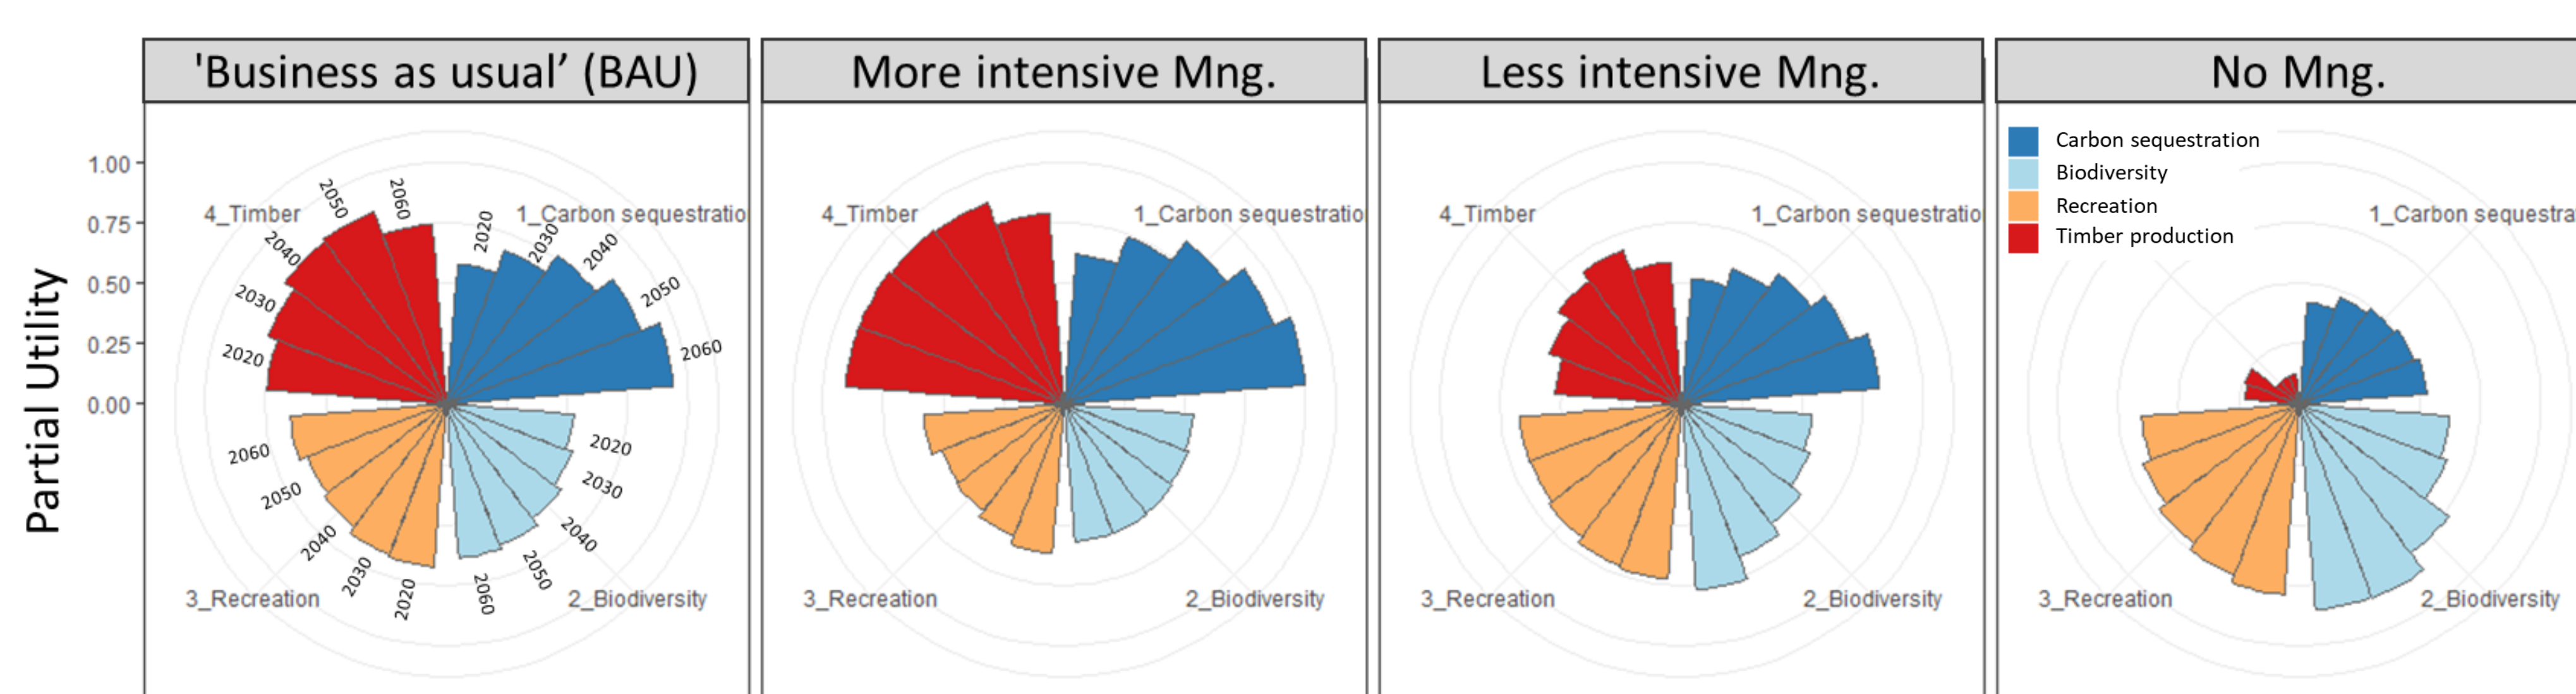

Fig. 3: Development of indicators for biodiversity and ecosystem services (carbon sequestration, timber production, recreation) for four alternative management strategies at the case-study enterprise Wagenrain in Switzerland. Note that different colours indicate different ecosystem services and indicators are expressed as normalized values (partial utilities) for comparability. Values range from 0 (lowest value) to 1 (optimum value), see Blattert et al. (2018)

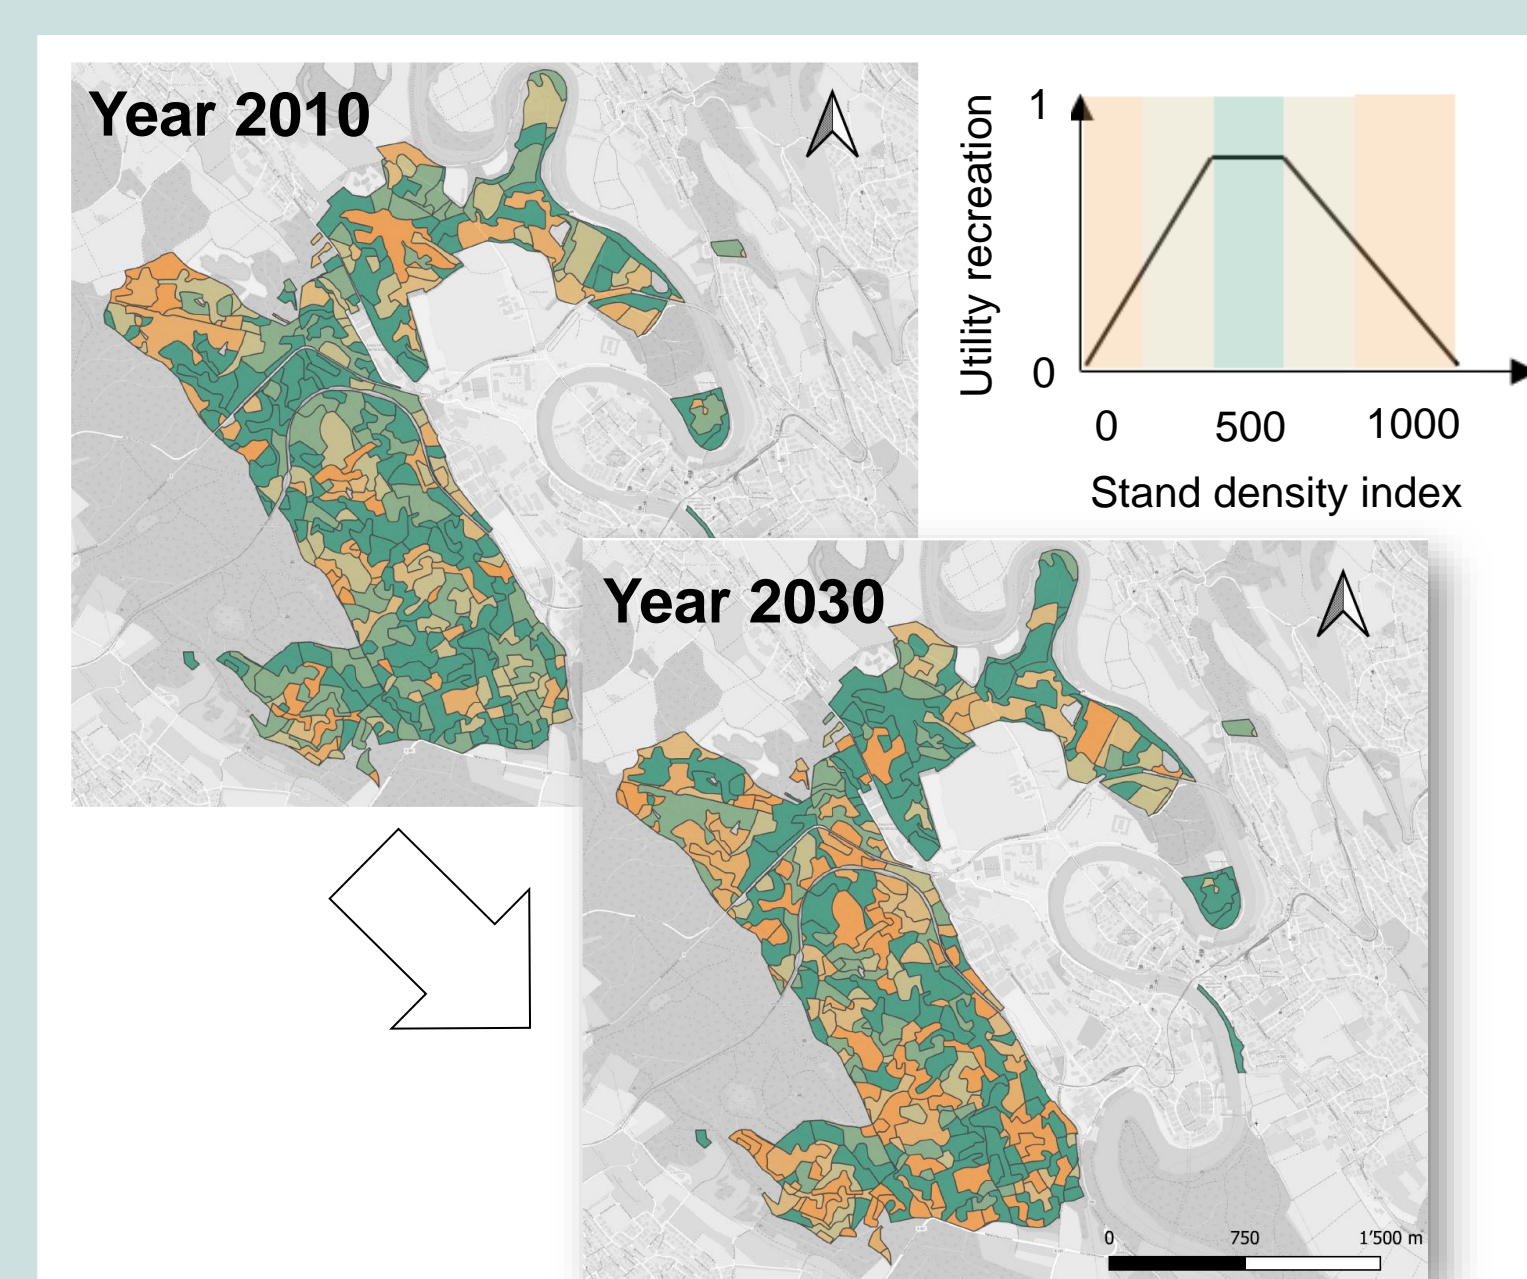

Fig. 4 Development of recreation value (stand density index indicating visual attractiveness, see Blattert et al., 2018) for ‘Less intensive Mng.’ strategy. Note that colours indicate recreation utility value (green: high, orange: low)

## Outlook:

- Evaluation of different management strategies under climate change scenarios, using multi-criteria decision analysis
- Inclusion of further case study enterprises in mountainous regions

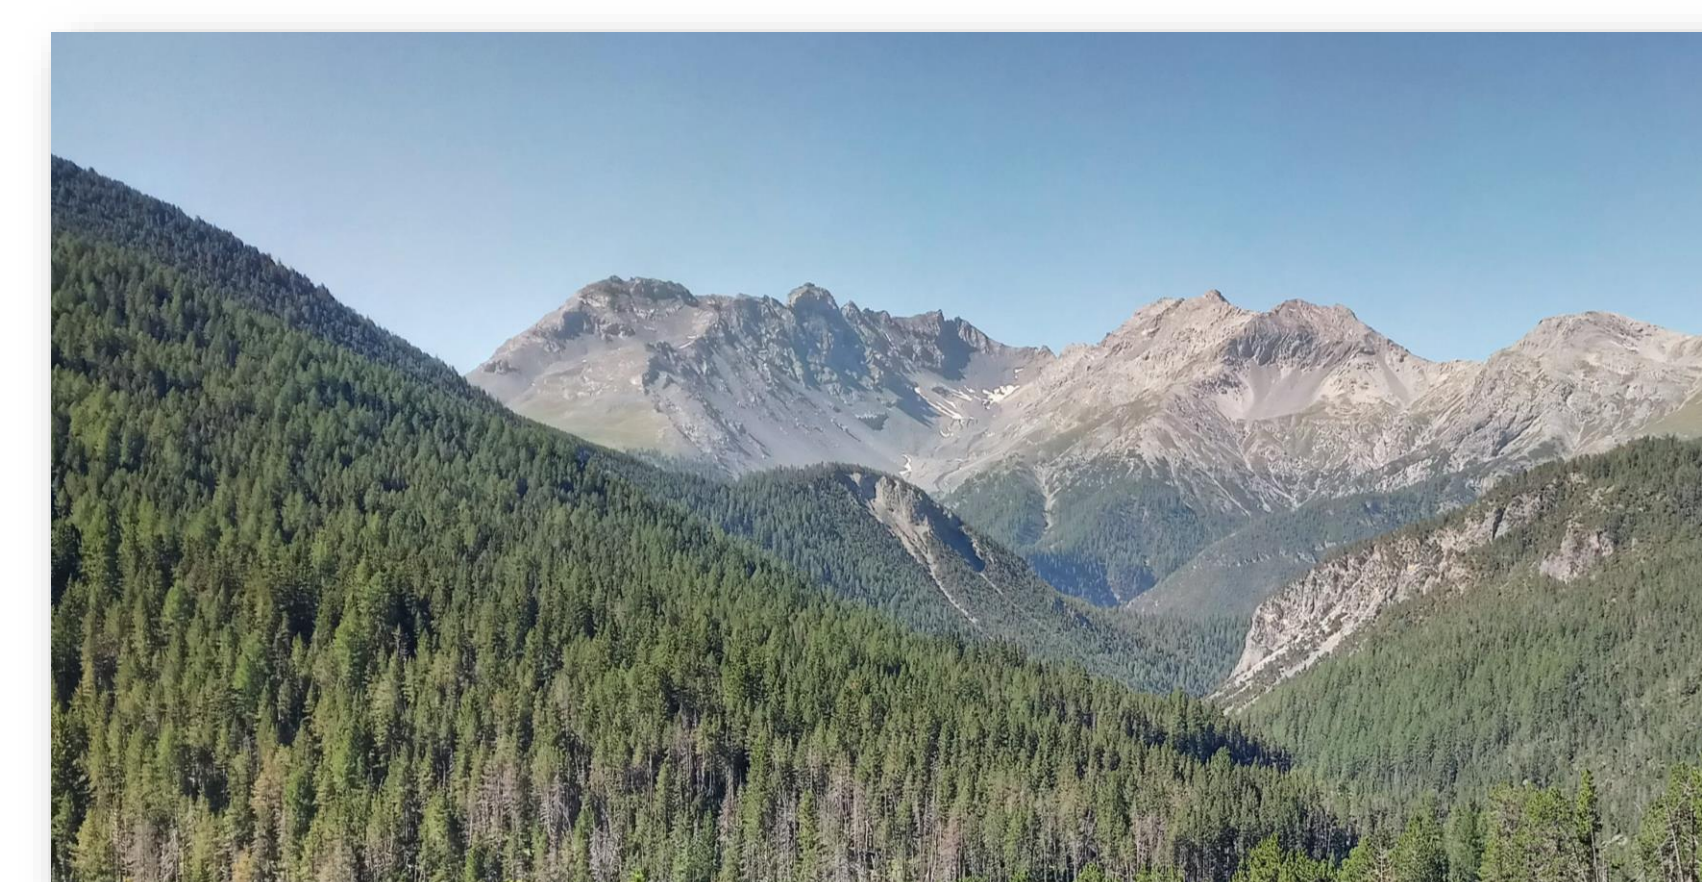

Fig. 5: Mountain forests in Grisons, Switzerland © T. Thrippleton, WSL

## References:

- 1: Zell, J.; Nitzsche, J.; Stadelmann, G.; Thürig, E. (2020): Swiss-StandSim: ein klimasensitives, einzelbaumbasiertes Waldwachstumsmodell. Schweizerische Zeitschrift für Forstwesen 171: 116–123
- 2: Blattert, C.; Lemm, R.; Thees, O.; Hansen, J.; Lexer, M.J.; Hanewinkel, M. (2018): Segregated versus integrated biodiversity conservation: Value-based ecosystem service assessment under varying forest management strategies in a Swiss case study. Ecological Indicators 95: 751–764
